# Supplementary material for: Prognostic Value of Apoptosis-Inducing Factor (AIF) in Germ Cell Tumors
Source: Cancers (Basel). 2021 Feb 13;13(4):776. doi: 10.3390/cancers13040776 (PMC7917670; doi:10.3390/cancers13040776)
Supplement: Supplementary file 1 [file cancers-13-00776-s001.pdf]

## Supplementary materials

### Prognostic Value of Apoptosis-Inducing Factor (AIF) in Germ Cell Tumors

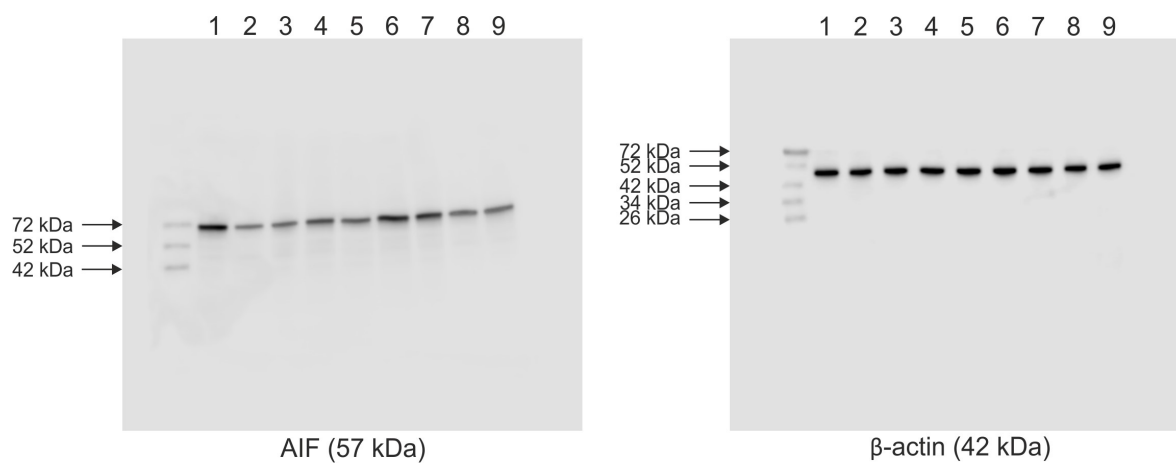

|   | Sample           | AIF intensity | $\beta$ -actin intensity | AIF/ $\beta$ -actin ratio |
|---|------------------|---------------|--------------------------|---------------------------|
| 1 | positive control | 8675          | 10389                    | 8,35                      |
| 2 | NTERA-2          | 4324          | 9848                     | 4,39                      |
| 3 | NTERA-2 CisR     | 4842          | 10378                    | 4,67                      |
| 4 | JEG-3            | 6613          | 10244                    | 6,46                      |
| 5 | JEG-3 CisR       | 5951          | 10571                    | 5,63                      |
| 6 | NOY-1            | 8600          | 10981                    | 7,83                      |
| 7 | NOY-1 CisR       | 7672          | 10402                    | 7,38                      |
| 8 | TCam-2           | 5242          | 9408                     | 5,57                      |
| 9 | TCam-2 CisR      | 5825          | 9470                     | 6,15                      |

**Supplementary Figure S1.** Western blot analysis of AIF and  $\beta$ -actin levels in different GCT cell lines. AIF and  $\beta$ -actin intensities, and AIF/ $\beta$ -actin ratios for each cell line are listed in the table.
